# Supplementary material
Source: Springer Nature journal article supplement (https://www.springermedizin.de/resource/supplementary/12963_2011_172_MOESM10_ESM.pdf/9572812)

# InterVA analysis, performed separately for each age group (adult, child, neonate)

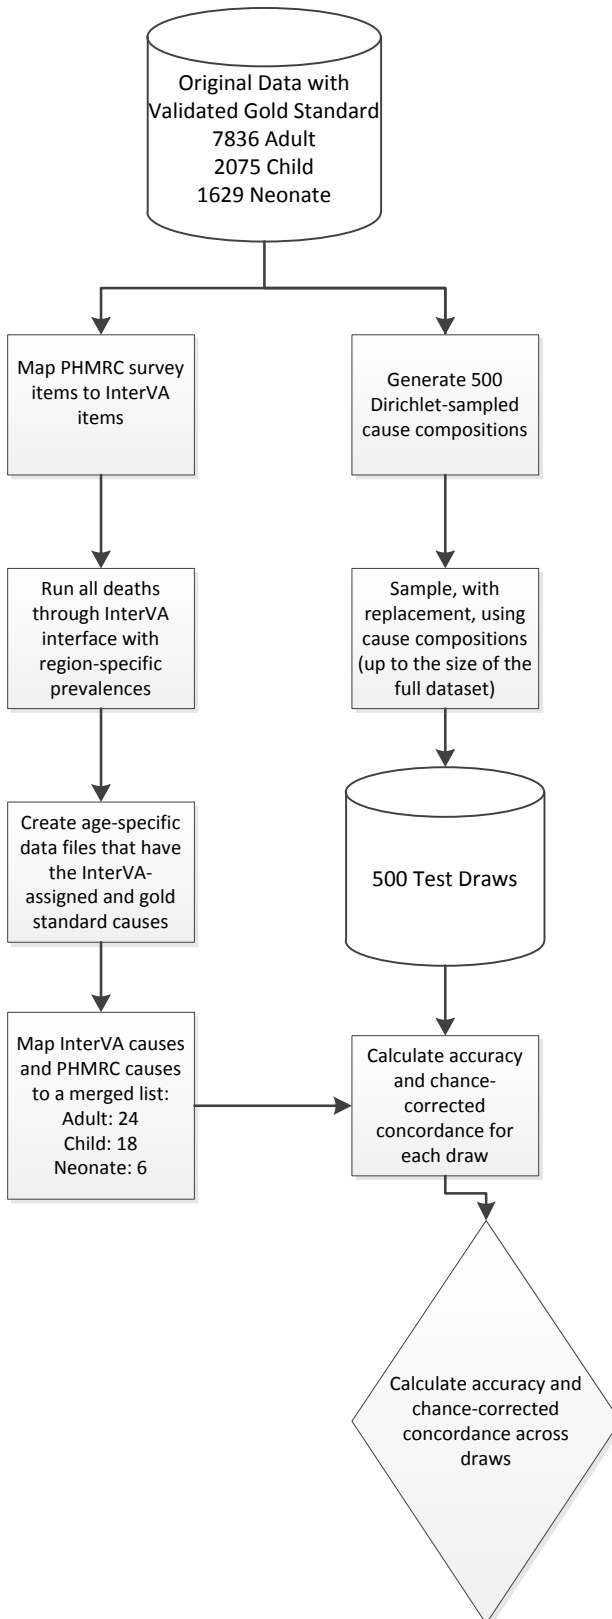

Supplement: MOESM10 [file 9572812]
